# Supplementary material for: Enhanced photoelectrochemical oxidation of glycerol to dihydroxyacetone coupled with hydrogen generation via accelerative middle hydroxyl dehydrogenation over a Bi0/Bi3+ interface of a cascade heterostructure
Source: Royal Society of Chemistry journal article supplement (doi:10.1039/d3ta04326f), 2023-01-01
Supplement: d3ta04326f1.pdf [file d3ta04326f1.pdf]

1

## Supporting Information

2 **Enhanced Photoelectrochemical Oxidation of Glycerol to**  
3 **Dihydroxyacetone Coupled with Hydrogen Generation via**  
4 **Accelerative Middle Hydroxyl Dehydrogenation over a Bi<sup>0</sup>/Bi<sup>3+</sup>**  
5 **Interface of Cascade Heterostructure**

6 Xinyan Feng <sup>a</sup>, Xuefan Feng <sup>a</sup>, Fuqin Zhang<sup>a\*</sup>

7 <sup>a</sup> Powder Metallurgy Research Institute, Central South University, Changsha 410083,  
8 PR China

9 \* Corresponding authors: Fuqin Zhang, E-mail: [zhangfuqin@csu.edu.cn](mailto:zhangfuqin@csu.edu.cn)

10

## 11 **Experimental Section**

### 12 **Chemicals and materials**

13 Ammonium metatungstate ((NH<sub>4</sub>)<sub>6</sub>H<sub>2</sub>W<sub>12</sub>O<sub>40</sub>•xH<sub>2</sub>O, AR, ≥99.5%), bismuth nitrate  
14 pentahydrate (Bi(NO<sub>3</sub>)<sub>3</sub>•5H<sub>2</sub>O, AR, ≥99.0%), ammonium metavanadate (NH<sub>4</sub>VO<sub>3</sub>, AR,  
15 ≥99.5%) were purchased from Macklin Reagent Co., Ltd. Sulfuric acid (H<sub>2</sub>SO<sub>4</sub>, AR,  
16 98%), hydrogen nitrate (HNO<sub>3</sub>, AR, 65-68%), hydrochloric acid (HCl, AR, 37%)  
17 sodium sulfate (Na<sub>2</sub>SO<sub>4</sub>, AR, ≥99.5%), oxalic acid (C<sub>2</sub>H<sub>2</sub>O<sub>4</sub>, AR, ≥99.5%) citric acid  
18 (C<sub>6</sub>H<sub>8</sub>O<sub>7</sub>, AR, ≥99.5%), and hydrazine hydrate were obtained from Sinopharm  
19 Chemical Reagent Co., Ltd. All the reagents were used without further purification.

### 20 **PEC performance for photoanodes**

21 The PEC performance was performed on an electrochemical workstation  
22 (CHI760E), the electrolyte was 0.5 M Na<sub>2</sub>SO<sub>4</sub> mixed with 0.1 M glycerol electrolyte  
23 with pH adjusted to 2 by H<sub>2</sub>SO<sub>4</sub>, the light source was a 300 W Xe lamp (CEL-PF300-  
24 T8) with an AM 1.5G filter, and the standard three-electrode configuration consisted of  
25 a working electrode (as-prepared photoanodes), a counter electrode (platinum foil) and  
26 a reference electrode (Ag/AgCl electrode).

27 Electrochemical impedance spectroscopy (EIS) was employed to determine the  
28 charge carrier mobility. EIS spectra were monitored with 5 mV AC voltage amplitude,  
29 where the frequency range was set to be 0.1-10<sup>6</sup>Hz. The transient photocurrent response  
30 was performed without bias voltage under irradiation of a xenon lamp with an interval  
31 of 30 s for light on and off. Mott-Schottky (MS) curves were collected at the amplitude  
32 of 5 mV scanning from -0.5 V to 0.5 V (vs. Ag/AgCl) with a 1000 Hz frequency under  
33 dark condition.

34 The reversible hydrogen electrode (RHE) potentials were converted from the  
35 measured potentials according to the followed equation:

$$36 E_{\text{RHE}} = E_{\text{Ag/AgCl}} + E_{\text{Ag/AgCl vs. NHE}} + 0.059 \times \text{pH} \quad (1)$$

37 where  $E_{\text{Ag/AgCl vs. NHE}}$  is 0.197 V at 25 °C.

38 Selectivity of DHA was calculated by:

$$39 \text{ Selectivity (DHA)} = c_{\text{DHA}} / (c_{\text{DHA}} + c_{\text{GLD}} + c_{\text{GA}} + c_{\text{FA}}) \times 100\% \quad (2)$$

40 Faradaic efficiency was calculated by:

$$41 \quad \text{Faradaic efficiency} = e_{\text{products}} \times n_{\text{products}} \times N / (Q/n) \times 100\% \quad (3)$$

42 where  $e_{\text{products}}$  is the number of holes required to oxidize glycerol molecule to products,  
43 including DHA ( $e = 2$ ), GLD ( $e = 2$ ), GA ( $e = 2$ ), FA ( $e = 8$ ),  $n_{\text{products}}$  is the productivity  
44 of products,  $N$  is Avogadro's constant ( $N = 6.02 \times 10^{23}$ ),  $Q$  is the quantity of electric  
45 charge, and  $n$  is the elementary charge ( $e = 1.602 \times 10^{-19}\text{C}$ ).

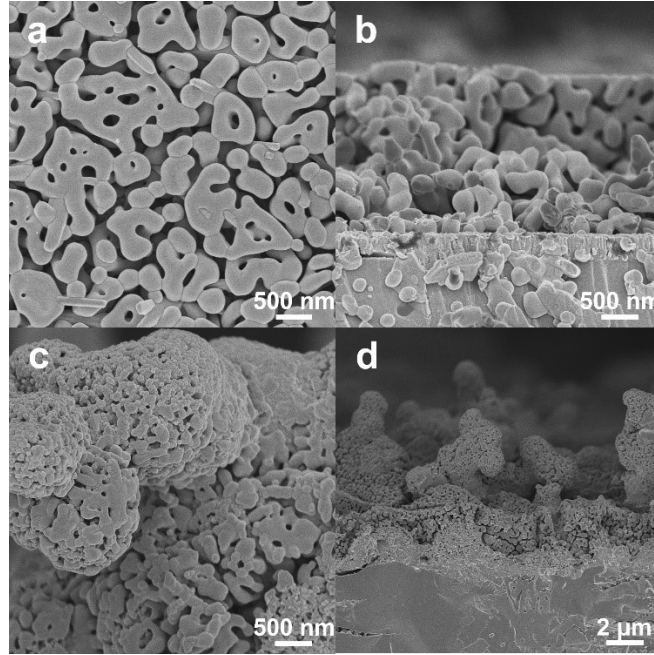

46

47 Fig. S1. (a) SEM image of BiVO<sub>4</sub> (top-view). (b) SEM image of BiVO<sub>4</sub> (cross-view).

48 (c) SEM image of WO<sub>3</sub>/BiVO<sub>4</sub> (top-view). (d) SEM image of WO<sub>3</sub>/BiVO<sub>4</sub> (cross-

49 view).

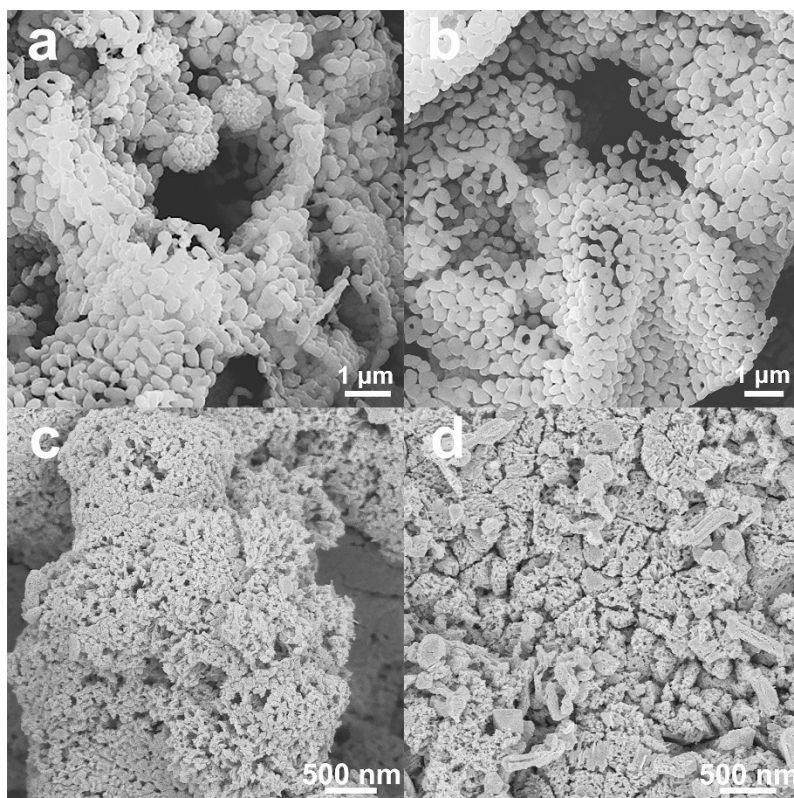

50

51 Fig. S2. (a) Top-view SEM image of  $\text{WO}_3/\text{BiVO}_4\text{-30}$ . (b) Top-view SEM image of  
 52  $\text{WO}_3/\text{BiVO}_4\text{-40}$ . (c) Top-view SEM image of  $\text{WO}_3/\text{BiVO}_4/\text{Bi-0.15\%}$ . (d) Top-view  
 53 SEM image of  $\text{WO}_3/\text{BiVO}_4/\text{Bi-0.20\%}$ .

54

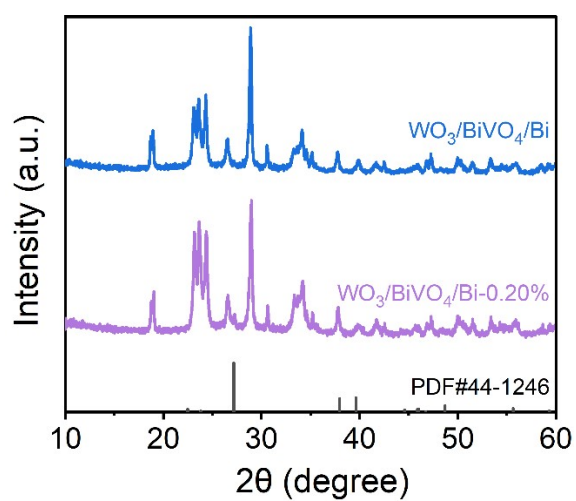

55

56 Fig. S3. XRD patterns of  $\text{WO}_3/\text{BiVO}_4/\text{Bi}$  and  $\text{WO}_3/\text{BiVO}_4/\text{Bi-0.20\%}$ .

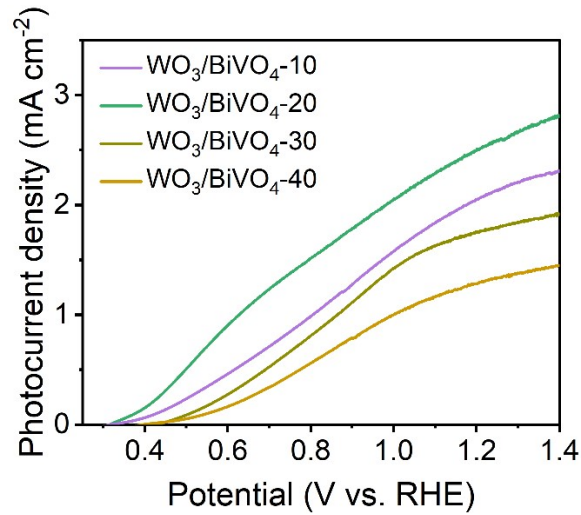

57

58 Fig. S4. LSV curves of WO<sub>3</sub>/BiVO<sub>4</sub>-10, WO<sub>3</sub>/BiVO<sub>4</sub>-20 (WO<sub>3</sub>/BiVO<sub>4</sub>), WO<sub>3</sub>/BiVO<sub>4</sub>-  
59 30 and WO<sub>3</sub>/BiVO<sub>4</sub>-40 photoanodes.

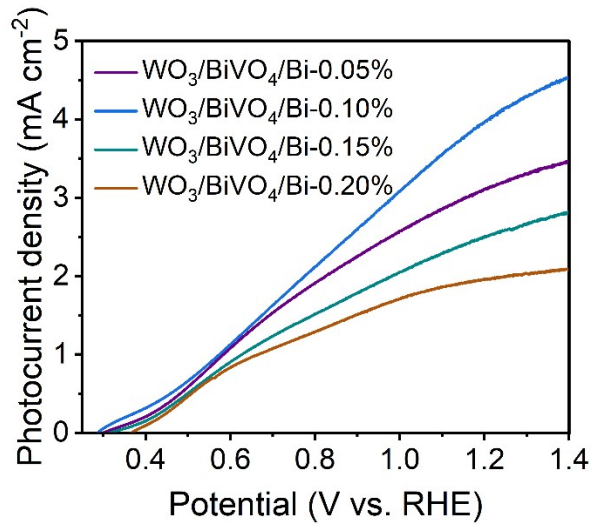

60

61 Fig. S5. LSV curves of WO<sub>3</sub>/BiVO<sub>4</sub>/Bi-0.05%, WO<sub>3</sub>/BiVO<sub>4</sub>/Bi-0.10%  
62 (WO<sub>3</sub>/BiVO<sub>4</sub>/Bi), WO<sub>3</sub>/BiVO<sub>4</sub>/Bi-0.15% and WO<sub>3</sub>/BiVO<sub>4</sub>/Bi-0.20% photoanodes.

63

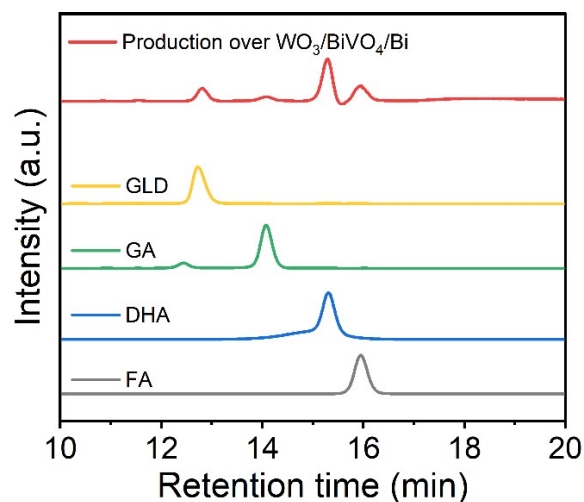

64

65 Fig. S6. High performance liquid chromatography (HPLC, UV detector = 210 nm)  
 66 spectra of the PEC glycerol oxidation products over  $\text{WO}_3/\text{BiVO}_4/\text{Bi}$  photoanode for 1  
 67 h.

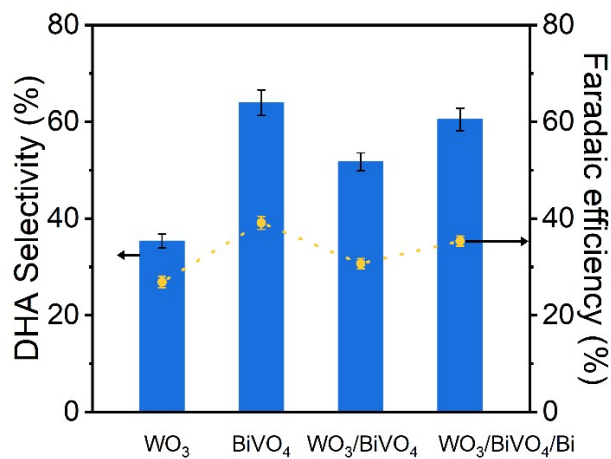

68

69 Fig. S7. DHA selectivity and faradaic efficiency in 0.5 M  $\text{Na}_2\text{SO}_4$  (pH = 2) with 0.1 M  
 70 glycerol over  $\text{WO}_3$ ,  $\text{BiVO}_4$ ,  $\text{WO}_3/\text{BiVO}_4$  and  $\text{WO}_3/\text{BiVO}_4/\text{Bi}$  photoanodes at 1.2 V vs.  
 71 RHE under AM 1.5G illumination ( $100 \text{ mW cm}^{-2}$ ).

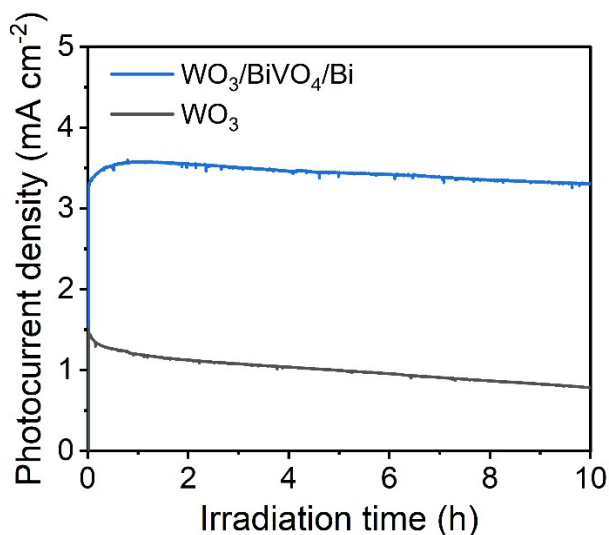

72

73 Fig. S8.  $J-t$  stability tests of  $\text{WO}_3$  and  $\text{WO}_3/\text{BiVO}_4/\text{Bi}$  photoanodes measured at 1.2 V  
 74 vs. RHE for 10 h.

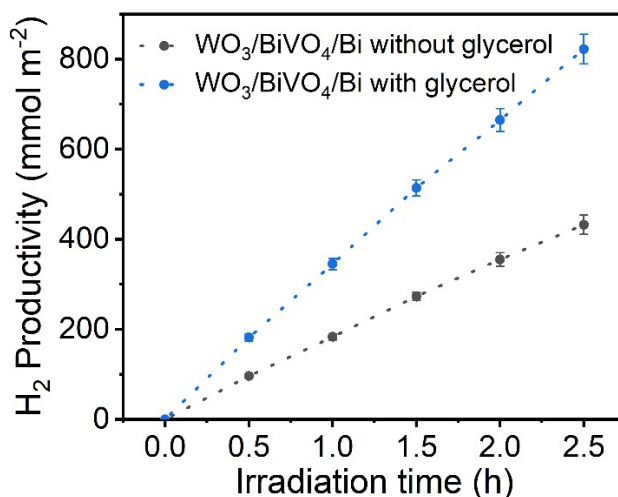

75

76 Fig. S9.  $\text{H}_2$  productivity in the  $\text{WO}_3/\text{BiVO}_4/\text{Bi-Pt}$  tandem cell measured at 1.2 V vs.  
 77 RHE with and without glycerol.

78 **Table S1.** Bi element contents of electrolyte after reaction for 1 h, 5 h and 10 h by  
 79 inductively coupled plasma-atomic emission spectroscopy (ICP-AES).

| Sample             | Bi content (%) |
|--------------------|----------------|
| electrolyte (1 h)  | <0.0001%       |
| electrolyte (5 h)  | <0.0001%       |
| electrolyte (10 h) | <0.0001%       |

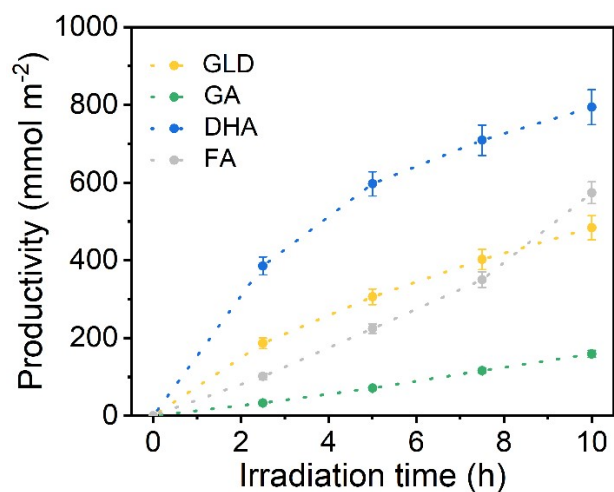

80

81 Fig. S10. Productivity of products in the  $\text{WO}_3/\text{BiVO}_4/\text{Bi-Pt}$  tandem cell measured at  
 82 1.2 V vs. RHE for 10 h.

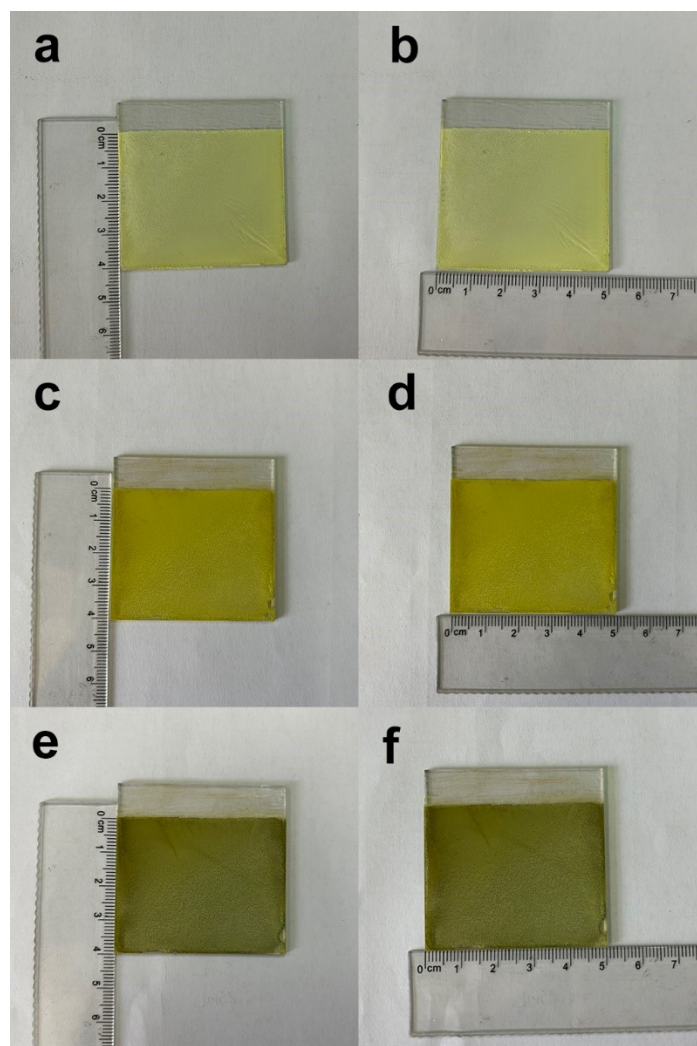

83

84 Fig. S11. Photographs of the the large size ( $5 \times 4 \text{ cm}^2$ ) photoanodes. (a, b)  $\text{WO}_3$   
 85 photoanode (c, d)  $\text{WO}_3/\text{BiVO}_4$  photoanode (e, f)  $\text{WO}_3/\text{BiVO}_4/\text{Bi}$  photoanode.



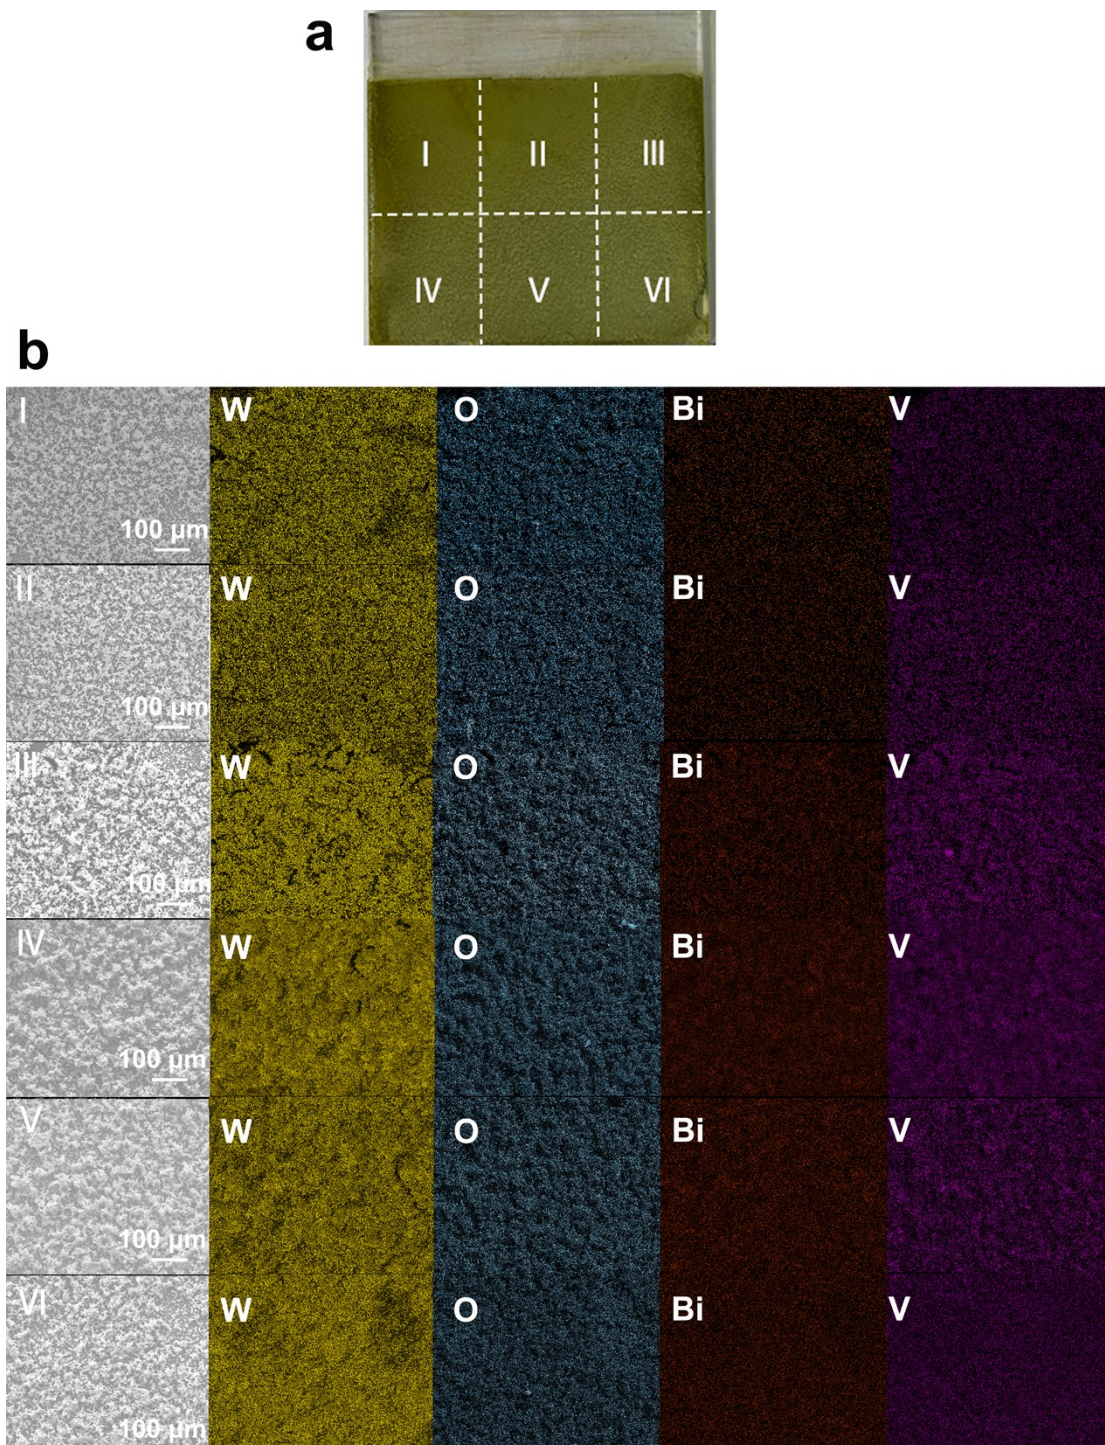

87 Fig. S12. (a) Photograph of the the large size  $\text{WO}_3/\text{BiVO}_4/\text{Bi}$  photoanodes (divided into  
 88 6 areas). (b) SEM and corresponding element mapping images in the above six areas.

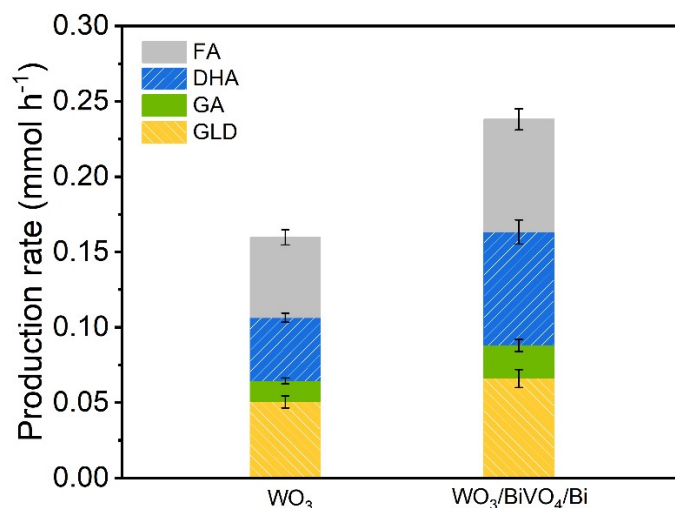

89

90 Fig. S13. Photoelectrocatalytic production rate of oxidation products on large-sized as-  
 91 prepared photoanodes.

92

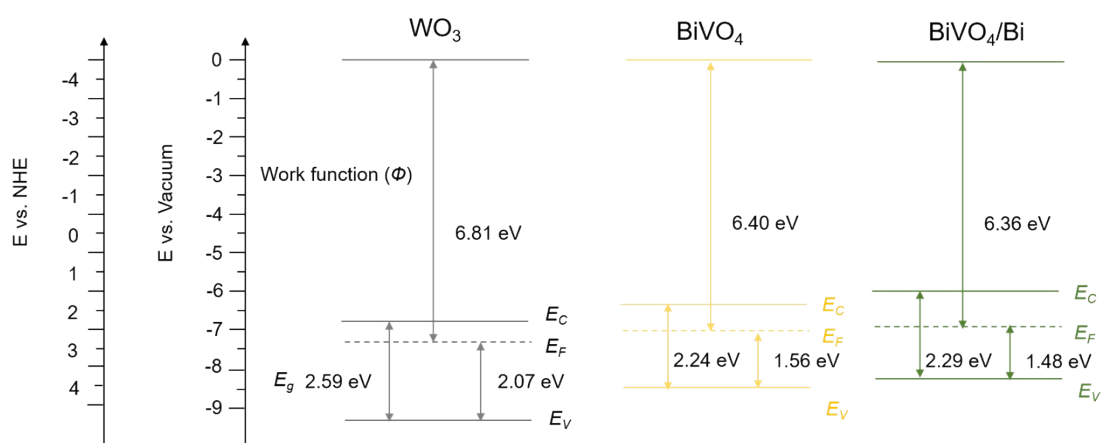

93

94 Fig. S14. Schematic energy band diagrams of WO<sub>3</sub>, BiVO<sub>4</sub> and BiVO<sub>4</sub>/Bi before  
 95 contact.  $E_g$ , band gap;  $E_F$ , Fermi level;  $E_C$ , conduction band position;  $E_V$ , valence band  
 96 position.

97
